1 **Characteristics of the sexual networks of gay, bisexual, and other men who**  
2 **have sex with men in Montréal, Toronto, and Vancouver: implications for the**  
3 **transmission and control of mpox in Canada**

4  
5 Fanyu Xiu<sup>1\*</sup>, Jorge Luis Flores Anato<sup>1\*</sup>, Joseph Cox<sup>1,2</sup>, Daniel Grace<sup>3</sup>, Trevor A. Hart<sup>3,4</sup>, Shayna  
6 Skakoon-Sparling<sup>4,5</sup>, Milada Dvorakova<sup>2</sup>, Jesse Knight<sup>6,7</sup>, Linwei Wang<sup>6</sup>, Oliver Gatalo<sup>3,6</sup>, Evan  
7 Campbell<sup>4</sup>, Terri Zhang<sup>4</sup>, Hind Sbihi<sup>8,9</sup>, Michael A. Irvine<sup>8,10</sup>, Sharmistha Mishra<sup>3,6,7,11</sup>, Mathieu  
8 Maheu-Giroux<sup>1‡</sup>

9  
10 \* these authors contributed equally

11 ‡ corresponding author

12  
13 **Author Affiliations:**

- 14 1. Department of Epidemiology and Biostatistics, McGill University, Montréal, QC,  
15 Canada.  
16 2. Research Institute of the McGill University Health Centre, Montréal, QC, Canada.  
17 3. Dalla Lana School of Public Health, University of Toronto, Toronto, ON, Canada.  
18 4. Department of Psychology, Toronto Metropolitan University, Toronto, ON, Canada.  
19 5. Department of Psychology, University of Guelph, Guelph, ON  
20 6. MAP Centre for Urban Health Solutions, Unity Health Toronto, Canada.  
21 7. Institute of Medical Sciences, University of Toronto, Toronto, ON, Canada.  
22 8. Data and Analytic Services, British Columbia Centre for Disease Control, Vancouver,  
23 BC, Canada.  
24 9. School of Population and Public Health, University of British Columbia, Vancouver, BC,  
25 Canada.  
26 10. Faculty of Health Sciences, Simon Fraser University, Burnaby, BC, Canada.  
27 11. Department of Medicine, St. Michael's Hospital, University of Toronto, Toronto, ON,  
28 Canada.

29  
30 **Abstract:** 280 words

31 **Main text:** 3,807 words

32  
33 **Corresponding author:**

34 Mathieu Maheu-Giroux, ScD  
35 Department of Epidemiology and Biostatistics,  
36 School of Population and Global Health  
37 McGill University  
38 2001 Avenue McGill College (Suite 1200),  
39 Montréal, QC, Canada,  
40 H3A 1G1  
41 E-mail: [mathieu.maheu-giroux@mcgill.ca](mailto:mathieu.maheu-giroux@mcgill.ca)  
42 Phone: (+1) 514-398-5110

## 43 Abstract

44

45 **Background:** The 2022-2023 global mpox outbreak disproportionately affected gay, bisexual,  
46 and other men who have sex with men (GBM). In Canada, >70% of cases thus far have been  
47 among GBM in Montréal, Toronto, and Vancouver. We examined how the distributions of  
48 sexual partners 1) varied by city and over time related to the COVID-19 pandemic and 2)  
49 were associated with mpox transmission.

50 **Methods:** The *Engage Cohort Study* (2017-2023) recruited GBM via respondent-driven  
51 sampling in Montréal, Toronto, and Vancouver (n=2,449). We compared numbers of sexual  
52 partners in the past 6 months across cities and three time periods: pre-COVID-19 pandemic  
53 (2017-2019), pandemic (2020-2021), and post-restrictions (2021-2023). We modeled the  
54 distribution of sexual partner numbers using Bayesian negative binomial regressions and  
55 post-stratification, adjusting for sampling design and attrition. We estimated the basic  
56 reproduction number ( $R_0$ ), secondary attack rate (SAR), and cumulative incidence  
57 proportion of mpox using the fitted distributions and case timeseries.

58 **Results:** The pre-COVID-19 pandemic distribution of sexual partner numbers was similar across  
59 cities: participants' mean number of partners was 10.3 (95%CrI: 9.3-11.3) in Montréal, 12.8  
60 (11.1-14.7) in Toronto, and 10.6 (9.41-11.9) in Vancouver. Partner numbers decreased  
61 during the pandemic in all cities. Post-restrictions, sexual activity increased but remained  
62 well below pre-pandemic levels. Based on reported cases and post-restrictions distributions,  
63 the estimated  $R_0$  (2.4-2.6) and cumulative incidences (0.6-0.9%) were similar across cities.  
64 The estimated average SAR across cities was 79%.

65 **Conclusion:** GBM sexual activity after restrictions were lifted remained below pre-pandemic  
66 levels. Comparable sexual partner distributions across cities may explain similarities in  
67 mpox  $R_0$  and cumulative incidence across cities. Public health authorities should consider  
68 the risk of mpox resurgence for future vaccination and surveillance strategies as sexual  
69 activity is expected to recover.

70 **Key words:** mpox; men who have sex with men; sexual networks; heavy-tailed network;  
71 secondary attack rate; basic reproduction number.

72

## 73 **Background**

74 A global outbreak of mpox (the disease caused by monkeypox virus) unfolded from  
75 May–October 2022, predominantly affecting gay, bisexual, and other men who have sex with  
76 men (GBM). The outbreak was unprecedented in its spread through sexual networks, number of  
77 cases generated, and geographical distribution, with most of the nearly 90,000 confirmed cases  
78 worldwide (May 2022–June 2023) occurring among GBM in regions with no previous history of  
79 reported transmission.<sup>1–3</sup> These unusual transmission patterns of mpox virus were recognized by  
80 the *World Health Organization* (WHO) as a public health emergency of international concern  
81 (lasting from July 2022 to May 2023).<sup>4</sup>

82 In Canada, over 70% of reported cases were concentrated among GBM in the three  
83 largest cities: Montréal, Toronto, and Vancouver.<sup>5–7</sup> Mpox cases were identified at the frontlines,  
84 in GBM sexual health clinics, with swift responses from community, clinical, and public health  
85 partners.<sup>6,7</sup> Since December 2022, sporadic new cases have been reported to the *Public Health*  
86 *Agency of Canada*,<sup>8</sup> and questions remain regarding the future risk of mpox resurgence.<sup>9</sup>

87 An important factor shaping transmission during the 2022–2023 mpox outbreak was the  
88 structure of GBM sexual networks.<sup>10,11</sup> Studies from Europe and North America attributed local  
89 outbreaks to densely clustered sexual networks among GBM with a high number of sexual  
90 partners.<sup>12–15</sup> Additionally, earlier case investigations revealed close linkages to international  
91 travel and sex-on-premises venues.<sup>2,12,16</sup> The concept of “core group” in sexually transmitted  
92 infections posits that a small group of individuals with a high number of sexual partners  
93 disproportionately contribute to transmission.<sup>17</sup> It recognizes that heterogeneity in sexual partners  
94 is crucial to transmission dynamics. In other words, the average number of sexual partners from  
95 a chosen member of the sexual network (i.e., degree) is not as informative as the distribution of  
96 sexual partner numbers (i.e., *degree distribution*) of that network. As such, mathematical  
97 modeling suggested that the basic reproduction number ( $R_0$ ) of mpox—the expected number of  
98 secondary cases arising from an initial infection in an entirely susceptible population— may be  
99 significantly greater than 1 as reported among GBM in the United Kingdom.<sup>14</sup> Estimates of  $R_0$   
100 from other modeling studies based on European and Canadian populations ranged from 1.5 to  
101 4.3.<sup>18</sup>

102           Although these findings have provided insights into the transmission dynamics of mpox,  
103 there remains uncertainty regarding how GBM sexual networks in major Canadian cities shaped  
104 transmission. The outbreak occurred in the aftermath of the COVID-19 pandemic, which may  
105 have affected usual sexual networks of GBM. For instance, the lifting of travel restrictions and  
106 other public health measures may have increased the number and types of sexual partnerships  
107 formed and facilitated international dissemination of the virus.<sup>12,16,19,20</sup>

108           Given these uncertainties, we leveraged data from the *Engage Cohort Study* and public  
109 mpox incidence data to improve our understanding of the relationship between sexual network  
110 density and mpox transmission during 2022–2023 in Montréal, Toronto, and Vancouver.  
111 Specifically, we estimated the distribution of sexual partner numbers among GBM in each city,  
112 and investigated how these distributions changed over time to assess the influence of COVID-19  
113 pandemic on sexual behaviours. We also assessed the transmission potential of mpox in each city  
114 by estimating the  $R_0$  and cumulative mpox incidence in each city, and the average secondary  
115 attack rate (SAR) across cities.

## 116 **Methods**

### 117 **Study setting and population**

118           The *Engage Cohort Study* (*Engage*; 2017–present) is a prospective, population-based  
119 cohort study of GBM in Montréal, Toronto, and Vancouver. Eligible participants were self-  
120 identified cis or trans men living in one of the three cities, aged  $\geq 16$  years, who reported sex with  
121 another man in the past 6 months (P6M), understood English or French, and provided written  
122 consent. From February 2017 to August 2019, participants were recruited using respondent-  
123 driven sampling (RDS), a method used to sample hard-to-reach populations to estimate more  
124 representative population characteristics.<sup>21</sup> Initial participants were purposively selected to  
125 represent diverse characteristics of the GBM community, and all participants were invited to  
126 recruit up to six peers in their social networks. Details of the cohort, including use of the RDS  
127 method, have been detailed in previous research.<sup>22,23</sup>

128           To investigate changes in sexual behaviours related to the COVID-19 pandemic, we used  
129 data from baseline visits and two follow-up visits:

- 130 • The *pre-pandemic period* was defined as the participants’ baseline visit (February 2017–  
131 August 2019).
- 132 • The *pandemic period* was the earliest follow-up visit that occurred between June 2020–  
133 November 2021, covering successive waves of COVID-19 pandemic measures. The start  
134 of this period was chosen because *Engage* study visits only resumed three months after  
135 the COVID-19 pandemic was declared by the WHO (March 11th, 2020)<sup>24</sup>. The end of  
136 the period was the start of the post-restrictions period.
- 137 • The *post-restrictions period* was defined as the latest follow-up visit that occurred  
138 between December 2021–February 2023. To ensure consistency of the time periods  
139 across cities, we defined the start of this period based on the easing of entry requirements  
140 for non-essential travel into Canada (September 3, 2021).<sup>25</sup> The start of the time period  
141 was shifted forward by three months to account for the 6-month recall period used in the  
142 *Engage* questionnaire. Additionally, we used travel restrictions given the history of  
143 international travel reported from initial mpox case investigations. The end of this period  
144 was the latest available data cut from the *Engage Cohort Study* (February 2023).

## 145 **Variables**

146 Our primary outcome was the self-reported number of sexual partners in the P6M,  
147 measured through the question “*During the PAST 6 MONTHS, with how many guys have you*  
148 *had any kind of sex (anal, oral, mutual masturbation, rimming, frontal/vaginal, etc.)?*”. Informed  
149 by epidemiological data on mpox cases,<sup>2,12,26</sup> the following bio-behavioral variables were  
150 considered correlates of the number of sexual partners in the P6M in the analyses (details in  
151 *Table S1*):

- 152 • Age (18-29, 30-39, 40-49, 50-59, ≥60 years);
- 153 • Relationship status and sexual arrangement (no relationship, exclusive relationship, open  
154 relationship, unclear);
- 155 • HIV status (determined using 4th generation testing with a confirmatory assay; or self-  
156 report if testing data unavailable [4% participants at baseline]);
- 157 • Visit to bathhouses and/or sex clubs at least once in the P6M (binary);
- 158 • Attendance of group sex events at least once in the P6M (binary);
- 159 • Use of dating apps to find partners at least once in the P6M (binary); and

- 160       • Participation in transactional sex at least once in the P6M (i.e., receive money and/or  
161       goods in exchange for sex; binary).

162       Missing values for the last four variables were handled using the missing indicator  
163       method for all analyses.<sup>27</sup>

### 164 **Distribution of sexual partner numbers, rationale for weighting, and computation of** 165 **weights**

166       To estimate the distribution of sexual partner numbers in each city, we modeled the  
167       observed distributions in a Bayesian framework. Briefly, we first fitted a negative binomial  
168       regression model to the number of sexual partners in P6M, using the correlates mentioned above  
169       as covariates in the model. We then incorporated sampling and attrition weights via post-  
170       stratification, by using the fitted posterior sample of the number of sexual partners in P6M for  
171       each participant. Lastly, we computed the fitted population distribution of sexual partner  
172       numbers based on the post-stratified samples.

173       We chose a regression approach over direct distribution fitting to examine individual  
174       correlates and to incorporate survey sampling and attrition weights. Regression models were  
175       fitted using Hamiltonian Monte Carlo in *Stan*, with 4,000 iterations (2 chains, 2,000 burn-in  
176       iterations, no thinning), using non-informative priors and assessing convergence via traceplots  
177       and  $\hat{R}$ . We then used the posterior distribution of each participant's outcome to estimate the  
178       population distribution of sexual partner numbers, incorporating RDS-II weights and inverse  
179       probability of censoring weights (IPCW) via post-stratification. For the pre-COVID-19  
180       pandemic time period, only RDS-II weights were used. To adjust for attrition in the pandemic  
181       and post-restrictions time periods, we used the product of RDS-II weights and IPCW (henceforth  
182       RDS-IPC weights).

183       Given that *Engage* is an RDS sample, we used RDS-II weights to ensure the estimated  
184       distributions of sexual partner numbers were more representative of the target population  
185       (sexually active GBM in each city). In RDS samples, participants with larger social networks  
186       have a higher chance of being recruited; RDS-II weights adjust for this sampling design by  
187       assigning a weight that is inversely proportional to the self-reported network size.<sup>21</sup> To adjust for  
188       attrition at follow-up visits, we used IPCWs to reduce potential biases stemming from correlation  
189       between the outcome (number of sexual partners in P6M) and being lost to follow-up.<sup>28</sup>

190 Finally, to compare the distribution of sexual partner numbers between a pair of cities or  
191 time periods, we computed the proportion of the iterations (posterior distribution samples) that  
192 had greater cumulative density for  $\geq 25$  and  $\geq 100$  partners. These thresholds were based on a  
193 previous modeling study from the Netherlands, which estimated that GBM with a mean of 25  
194 partners in the P6M accounted for about 20% of mpox cases, and those with a mean of about 100  
195 partners accounted for over 60% of cases.<sup>29</sup>

## 196 **Basic reproduction numbers, secondary attack rate, and cumulative incidence proportion**

197 The basic reproduction number  $R_0$  is a measure of an infectious agent's transmission  
198 potential within a given network.<sup>30,31</sup> We first estimated the  $R_0$  of mpox in each city based on the  
199 fitted distribution of GBM's sexual partner numbers in the P6M (post-restrictions period), by  
200 using the next-generation matrix (NGM) approach.<sup>32</sup> Briefly, we partitioned the GBM population  
201 in each city into 100 sexual activity groups based on the number of sexual partners from the  
202 RDS-IPC-weighted posterior distribution. For each group, we computed the size (i.e., proportion  
203 of GBM in the group) and the average number of sexual partners. We constructed the  
204 transmission, transition and auxiliary matrices based on a Susceptible-Exposed-Infectious-  
205 Removed model, assuming no interventions or behaviour changes during the analysis period.  
206 The three matrices allowed for the construction of a NGM, and  $R_0$  was computed as the largest  
207 non-zero eigenvalue of this matrix. We repeated the procedure for each city at the post-  
208 restrictions period under a range of SAR<sup>33</sup>, defined here as the proportion of sexual partnerships  
209 that could be expected to result in transmission from an infected individual.<sup>34</sup>

210 Given the uncertainty in the SAR of mpox, we also estimated  $R_0$  from the reported mpox  
211 cases from Québec, Ontario, and British Columbia, where Montréal, Toronto, and Vancouver are  
212 located, respectively. Province-wide mpox incidence was assumed to reflect transmission in each  
213 city given that the majority of the cases were reported from these cities.<sup>5-7</sup> Briefly, we used  
214 publicly available data on reported mpox cases<sup>6</sup> to estimate this  $R_0$  using the formula  $R_0 = 1 +$   
215  $D\Lambda$ , where the duration of infectiousness  $D$  is assumed to be 17.3 days,<sup>35-38</sup> and the epidemic  
216 growth rate  $\Lambda$  was estimated from the slope of the log cumulative cases over time. We used the  
217 first 50 days after the first case in each province, which corresponded to the period of initial  
218 exponential growth.<sup>33</sup> We then compared the estimates of  $R_0$  calculated from the next-generation  
219 matrix to the case series to estimate the SAR. We estimated the SAR as the SAR value necessary

220 for the two methods of calculating  $R_0$  to be equal. Lastly, to quantify potential increases in mpox  
221 transmission if sexual activity recovers to pre-COVID-19 levels, we estimated the  $R_0$  using the  
222 NGM method based on the pre-pandemic distribution of sexual partner numbers and the average  
223 SAR across cities.

224 Lastly, we estimated the cumulative incidence proportion of mpox cases among GBM  
225 during the 2022–2023 outbreak in each city using GBM population size estimates from previous  
226 studies. Briefly, we assumed that sexually active GBM (sex with a man in P6M) constituted  
227 2.9% of the  $\geq 15$ -year-old male population in each city.<sup>39–41</sup> For each city’s population size, we  
228 used the 2021 census population counts of the corresponding census metropolitan area.<sup>42</sup>

### 229 **Sensitivity analyses**

230 We performed three sensitivity analyses. First, to verify the robustness of results  
231 regarding the distribution of sexual partner numbers to our weighting approach, we repeated the  
232 analyses restricting the analytical sample to participants who had visits at all three timepoints.  
233 Second, as age is an important determinant of sexual activity and differences in the age  
234 distribution of the participants across the three cities have been reported,<sup>43</sup> we performed  
235 regression-based standardization. Using all model covariates, we standardized the distributions to  
236 the covariate distribution observed in Vancouver. Lastly, given uncertainty regarding mpox  
237 transmission probabilities through different types of sex acts,<sup>2,44</sup> we repeated the analyses  
238 focusing on the number of anal sex partners as the outcome.

239 All analyses were conducted using *R* (version 4.2.2) and *RStan* (version 2.21.7).  
240 Additional details on methods can be found in the *Supplementary Methods*. The code used for  
241 analyses is available from GitHub ([https://github.com/pop-health-mod/  
242 mpox-engage-sex-networks](https://github.com/pop-health-mod/mpox-engage-sex-networks)).

### 243 **Ethics**

244 Ethics approval was obtained from the Research Institute of the McGill University Health  
245 Centre and the Research Ethics Office of the Faculty of Medicine and Health Sciences, McGill  
246 University (A06-M32-23B), Toronto Metropolitan University (REB #2016-113), the University  
247 of Toronto (protocol #00033527), St. Michael’s Hospital (REB #17-043), the University of  
248 Windsor (REB #33443), the University of British Columbia (H16-01226), Providence Health



249 Care (H16-01226), the University of Victoria (H16-01226), Simon Fraser University (H16-  
250 01226).

## 251 **Results**

### 252 **Study population**

253 There were 2,449 GBM recruited to *Engage*, with 1,179 participants in Montréal, 517 in  
254 Toronto, and 753 in Vancouver. Retention over the study period was slightly higher in Montréal,  
255 where 70% and 67% of participants had at least one visit during the pandemic and post-  
256 restrictions period, respectively, compared to 58% and 56% for Toronto, and 60% and 52% for  
257 Vancouver (*Table S2*).

258 Accounting for RDS-II, participants in Montréal were older on average than in Toronto  
259 and Vancouver—37% aged  $\geq 40$  years, versus 25% and 29%, respectively. In all three cities,  
260 approximately half of participants reported not being in a relationship at baseline. There were  
261 fewer participants living with HIV in Montréal (14%; 95% Confidence Interval [CI]: 12%–16%),  
262 compared to 22% (95%CI: 19%–26%) in Toronto and 20% (95%CI: 18%–23%) in Vancouver.  
263 More participants reported attending bathhouses and group sex in Toronto (39% [95%CI: 35%–  
264 43%] and 23% [95%CI: 19%–26%], respectively) than in Montréal (31% [95%CI: 29%–34%]  
265 and 16% [95%CI: 14%–18%]) and Vancouver (29% [95%CI: 26%–32%] and 21% [95%CI:  
266 18%–24%]). Lastly, the RDS-II-weighted mean number of sexual partners in the P6M was 8.7  
267 (95%CI: 7.4–9.9) in Toronto, compared to 8.1 (95%CI: 6.9–9.4) in Montréal and 8.0 (95%CI:  
268 6.8–9.2) in Vancouver (*Table 1*).

169 **Table 1. Unadjusted and RDS-II adjusted baseline estimates of the number of sexual partners in the past six months and its correlates among the**  
 170 **Engage Cohort Study participants in Montréal, Toronto, and Vancouver, 2017–2019**

|                                                             | Montréal |      |                            | Toronto |      |                            | Vancouver |      |                            | Overall |      |                            |
|-------------------------------------------------------------|----------|------|----------------------------|---------|------|----------------------------|-----------|------|----------------------------|---------|------|----------------------------|
|                                                             | n        | (%)  | RDS-II weighted % (95% CI) | n       | (%)  | RDS-II weighted % (95% CI) | n         | (%)  | RDS-II weighted % (95% CI) | n       | (%)  | RDS-II weighted % (95% CI) |
|                                                             | 1179     |      |                            | 517     |      |                            | 753       |      |                            | 2449    |      |                            |
| <b>Age group</b>                                            |          |      |                            |         |      |                            |           |      |                            |         |      |                            |
| 18-29                                                       | 384      | (33) | 36 (34–39)                 | 222     | (43) | 51 (46–55)                 | 293       | (39) | 45 (42–49)                 | 899     | (37) | 42 (40–44)                 |
| 30-39                                                       | 340      | (29) | 27 (24–29)                 | 183     | (35) | 24 (20–28)                 | 235       | (31) | 26 (23–29)                 | 758     | (31) | 26 (24–28)                 |
| 40-49                                                       | 166      | (14) | 15 (13–17)                 | 57      | (11) | 8 (6–10)                   | 86        | (11) | 10 (8–12)                  | 309     | (13) | 12 (10–14)                 |
| 50-59                                                       | 181      | (15) | 12 (10–14)                 | 39      | (8)  | 11 (8–14)                  | 91        | (12) | 11 (9–13)                  | 311     | (13) | 12 (10–14)                 |
| 60+                                                         | 108      | (9)  | 10 (8–12)                  | 16      | (3)  | 6 (4–8)                    | 48        | (6)  | 8 (6–10)                   | 172     | (7)  | 9 (8–10)                   |
| <b>Relationship status and sexual agreement</b>             |          |      |                            |         |      |                            |           |      |                            |         |      |                            |
| Single                                                      | 671      | (57) | 56 (53–59)                 | 279     | (54) | 47 (43–52)                 | 413       | (55) | 57 (54–61)                 | 1363    | (56) | 55 (53–57)                 |
| Open                                                        | 330      | (28) | 24 (22–27)                 | 173     | (33) | 25 (21–29)                 | 221       | (29) | 21 (18–24)                 | 724     | (30) | 23 (22–25)                 |
| Exclusive                                                   | 97       | (8)  | 10 (9–12)                  | 48      | (9)  | 21 (17–24)                 | 83        | (11) | 15 (13–18)                 | 228     | (9)  | 14 (13–15)                 |
| Unclear                                                     | 81       | (7)  | 9 (8–11)                   | 17      | (3)  | 7 (4–9)                    | 36        | (5)  | 7 (5–8)                    | 134     | (5)  | 8 (7–9)                    |
| <b>HIV status*</b>                                          |          |      |                            |         |      |                            |           |      |                            |         |      |                            |
| Seropositive                                                | 215      | (18) | 14 (12–16)                 | 101     | (20) | 22 (19–26)                 | 132       | (18) | 20 (18–23)                 | 448     | (18) | 18 (16–19)                 |
| Seronegative / unknown                                      | 964      | (82) | 86 (84–88)                 | 416     | (80) | 78 (74–81)                 | 621       | (82) | 80 (77–82)                 | 2001    | (82) | 82 (81–84)                 |
| <b>Bathhouse/sex club attendance in the P6M<sup>†</sup></b> |          |      |                            |         |      |                            |           |      |                            |         |      |                            |
| Yes                                                         | 452      | (38) | 31 (29–34)                 | 273     | (53) | 39 (35–43)                 | 283       | (38) | 29 (26–32)                 | 1008    | (41) | 32 (30–34)                 |
| No                                                          | 716      | (61) | 67 (65–70)                 | 237     | (46) | 56 (52–61)                 | 464       | (62) | 70 (67–73)                 | 1417    | (58) | 66 (64–68)                 |
| Missing <sup>‡</sup>                                        | 11       | (1)  | 1 (1–2)                    | 7       | (1)  | 5 (3–7)                    | 6         | (1)  | 1 (0–2)                    | 24      | (1)  | 2 (1–2)                    |
| <b>Group sex event attendance in the P6M<sup>†</sup></b>    |          |      |                            |         |      |                            |           |      |                            |         |      |                            |
| Yes                                                         | 273      | (23) | 16 (14–18)                 | 192     | (37) | 23 (19–26)                 | 208       | (28) | 21 (18–24)                 | 673     | (27) | 19 (17–20)                 |
| No                                                          | 900      | (76) | 83 (81–85)                 | 316     | (61) | 72 (68–75)                 | 540       | (72) | 79 (76–81)                 | 1756    | (72) | 79 (78–81)                 |
| Missing <sup>‡</sup>                                        | 6        | (1)  | 1 (0–2)                    | 9       | (2)  | 6 (4–8)                    | 5         | (1)  | 1 (0–1)                    | 20      | (1)  | 2 (1–2)                    |

|                                                               |                |               |                |               |               |             |                |               |  |  |  |
|---------------------------------------------------------------|----------------|---------------|----------------|---------------|---------------|-------------|----------------|---------------|--|--|--|
| <b>Dating app use to find partners in the P6M<sup>†</sup></b> |                |               |                |               |               |             |                |               |  |  |  |
| Yes                                                           | 766 (65)       | 56 (53–59)    | 403 (78)       | 60 (56–64)    | 556 (74)      | 65 (61–68)  | 1725 (70)      | 59 (57–61)    |  |  |  |
| No                                                            | 413 (35)       | 44 (41–47)    | 114 (22)       | 40 (36–44)    | 197 (26)      | 35 (32–39)  | 724 (30)       | 41 (39–43)    |  |  |  |
| <b>Transactional sex in the P6M<sup>†</sup></b>               |                |               |                |               |               |             |                |               |  |  |  |
| Yes                                                           | 88 (7)         | 6 (5–7)       | 54 (10)        | 6 (4–7)       | 42 (6)        | 6 (4–8)     | 184 (8)        | 6 (5–7)       |  |  |  |
| No                                                            | 1070 (91)      | 91 (89–93)    | 454 (88)       | 93 (91–95)    | 703 (93)      | 93 (91–94)  | 2227 (91)      | 92 (91–93)    |  |  |  |
| Missing <sup>‡</sup>                                          | 21 (2)         | 3 (2–4)       | 9 (2)          | 1 (0–2)       | 8 (1)         | 1 (1–2)     | 38 (2)         | 2 (2–3)       |  |  |  |
| <b>Number of sexual partners in the P6M (mean)</b>            |                |               |                |               |               |             |                |               |  |  |  |
|                                                               | 12.4 (SD 22.1) | 8.1 (6.9–9.4) | 19 (SD 1.6)    | 8.7 (7.4–9.9) | 12.2 (SD 19)  | 8 (6.8–9.2) | 13.7 (SD=23.8) | 8.2 (7.4–9.7) |  |  |  |
| <b>Number of anal sexual partners in the P6M (mean)</b>       |                |               |                |               |               |             |                |               |  |  |  |
|                                                               | 7.4 (SD 15.3)  | 4.9 (3.9–5.8) | 12.2 (SD 24.3) | 5.9 (4.7–7.1) | 8.3 (SD 15.4) | 5.2 (4.3–6) | 8.7 (SD=17.7)  | 5.2 (4.6–5.9) |  |  |  |

!71 CI, confidence interval; SD, standard deviation; P6M, past 6 months; RDS, respondent driven sampling.

!72 RDS-II weights are inversely proportional to participants' social network size.

!73 \* HIV status was determined based on 4th generation testing with a confirmatory assay. If the laboratory test result was unknown, self-reported status was used.

!74 † At least once in the P6M.

!75 ‡ Missing includes “prefer not to answer.”

!76

## 277 **Correlates of the networks' number of sexual partners**

278 In all three cities, a higher number of sexual partners in the post-restrictions period was  
279 strongly associated with attendance of group sex events, with a rate ratio (RR) of 3.65 (95%  
280 Credible Interval [CrI]: 2.79–4.74) in Montréal, 3.44 (95%CrI: 2.43–4.83) in Toronto, and 3.08  
281 (95%CrI: 2.22–4.32) in Vancouver. Other strong correlates were participation in transactional  
282 sex, usage of dating apps, and visit to bathhouses and/or sex clubs (*Table S3*).

## 283 **Differences in the distribution of sexual partner numbers by city and time period**

284 Overall, the fitted distribution of sexual partner numbers was similar across the three  
285 cities: the mean number of partners was 10.3 (95%CrI: 9.3-11.3) in Montréal, 12.8 (95%CrI:  
286 11.1-14.7) in Toronto and 10.6 (95%CrI: 9.41-11.9) in Vancouver. However, pre-pandemic,  
287 sexual networks in Toronto had the heaviest-tailed distribution, with 1.2% (95%CrI: 0.8-1.6%)  
288 of GBM reporting  $\geq 100$  partners in the P6M, compared with 0.5% (95%CrI: 0.3-0.7%) in  
289 Montréal and 0.3% (95%CrI: 0.1-0.5%) in Vancouver. All posterior distribution samples showed  
290 that Toronto had a larger cumulative density of  $\geq 100$  numbers of sexual partners than Montréal  
291 and Vancouver. This result held during the post-restrictions period: 0.5% (95%CrI: 0.2-0.9%) of  
292 GBM in Toronto reported  $\geq 100$  partners, 0.3% (95%CrI: 0.2-0.5%) in Montréal, and 0.4%  
293 (95%CrI: 0.2-0.7%) in Vancouver. Post-restrictions, Toronto had a larger cumulative density of  
294  $\geq 100$  numbers compared to Montréal and Vancouver (83% and 63% of the posterior distribution  
295 samples, respectively; *Figure 1; Figure S1*).

296 Compared to the pre-pandemic period, all three cities witnessed a marked reduction in the  
297 distribution of sexual partner numbers during the COVID-19 pandemic. In all three cities across  
298 all 4,000 posterior distribution samples, the cumulative density of  $\geq 25$  sexual partners in the  
299 P6M were consistently larger for the pre-pandemic vs. pandemic period. Sexual activities  
300 appeared to have rebounded after lifting travel restrictions: in Montréal, Toronto, and  
301 Vancouver, 100%, 100%, and 92% of posterior distribution samples showed a larger proportion  
302 of participants reporting  $\geq 25$  sexual partners in the P6M as compared to the pandemic period.  
303 However, sexual activities have not fully recovered to pre-pandemic levels: in all three cities,  
304 100% of the posterior distribution samples had a greater proportion of GBM with  $\geq 25$  sexual  
305 partners in the pre-pandemic than the post-restrictions period (*Figure 1*).

306

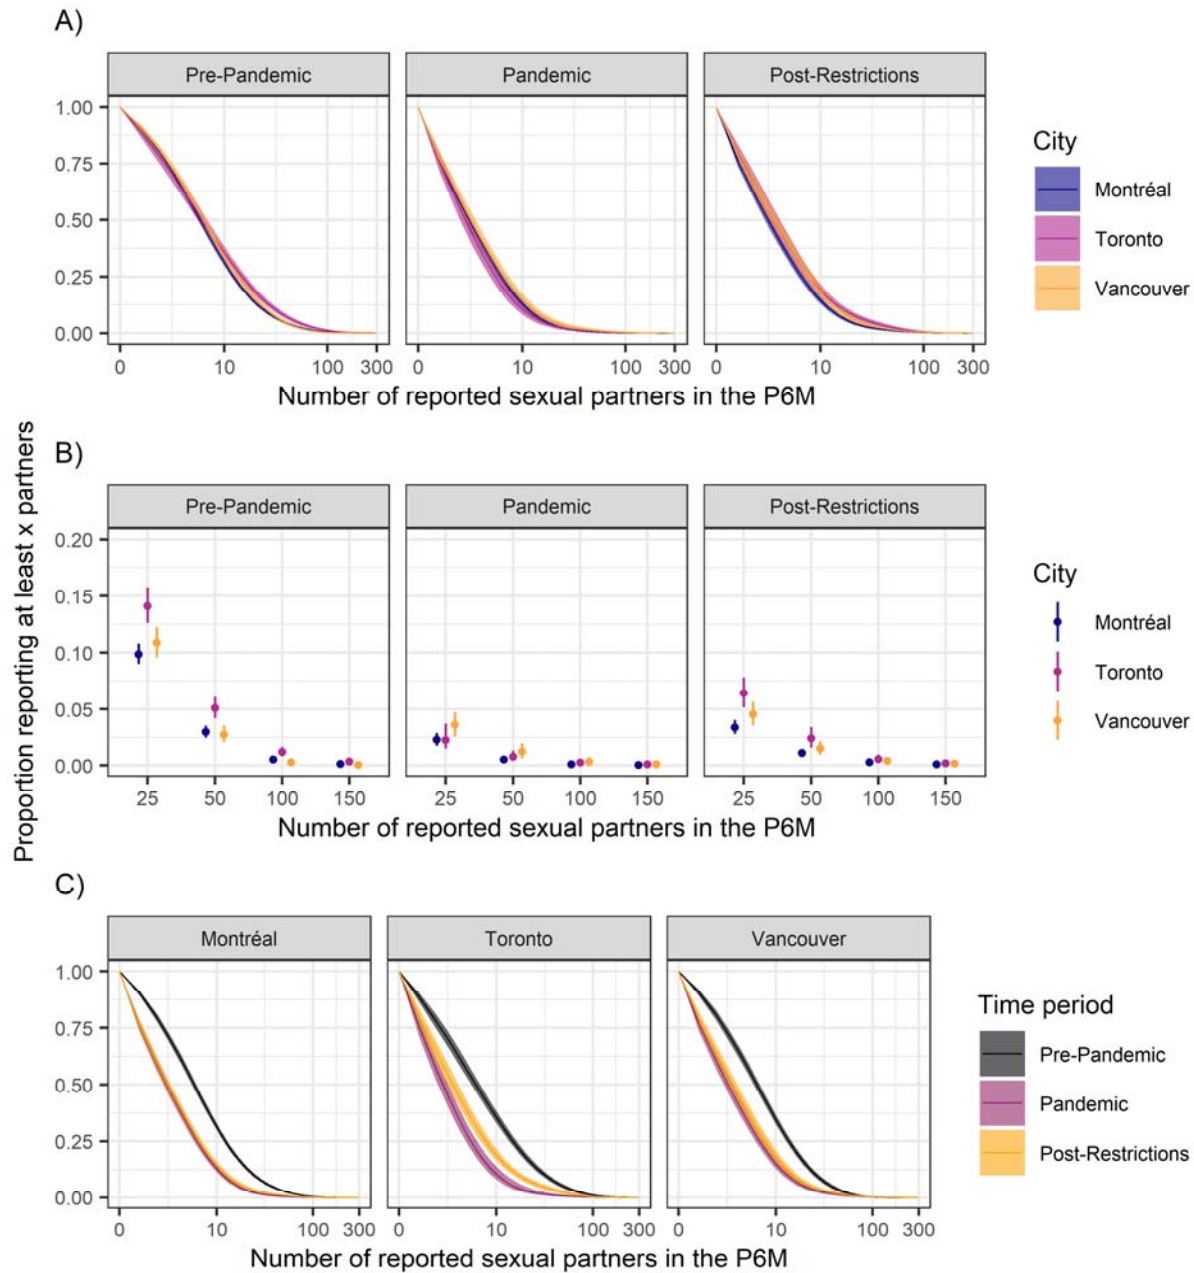

307  
 308 **Figure 1. Cumulative distribution of sexual partner numbers in the past 6 months across Montréal,**  
 309 **Toronto, and Vancouver at each time period, weighted by respondent driven sampling (RDS-II)**  
 310 **and inverse probability of censoring weights, with 95% credible intervals. A) Full distribution (one**  
 311 **time period per panel), B) Selected values (one time period per panel), C) Full distribution (one city per**  
 312 **panel). P6M: past 6 months.**

313

## 314 Basic reproduction numbers from reported case counts and the next-generation matrix

315 Based on the reported cases counts, we estimated an  $R_0$  of 2.55, 2.53 and 2.44 in  
316 Montréal, Toronto and Vancouver, respectively (**Figure 2A**). We also estimated a cumulative  
317 incidence proportion of mpox-diagnosed GBM ranging from 0.6–0.9% in all cities, assuming  
318 that GBM comprise 2.9% of all men  $\geq 15$  years old in each city (**Table S5, Figure S2**).

319 By comparing the  $R_0$  based on mpox cases to the NGM  $R_0$  estimated from the partnership  
320 distributions, we estimated that the average per-partnership SAR across cities was 79%. Based  
321 on this SAR, had the distribution of sexual partner numbers been at pre-pandemic levels, the  
322 mpox  $R_0$  using the NGM would have been 2.61 (Montréal), 3.59 (Toronto), and 2.27  
323 (Vancouver; **Figure 2B**).

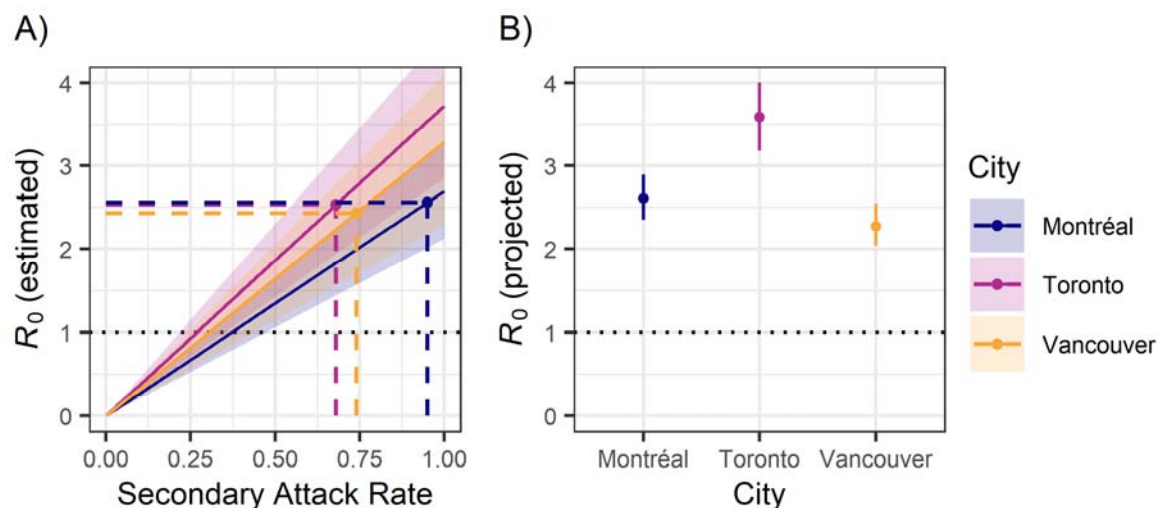

324 **Figure 2. Basic reproduction number ( $R_0$ ) of mpox.** A) City-specific  $R_0$  estimates based on the initial  
325 growth rate of reported mpox cases (dashed lines) and on the fitted distribution of sexual partner numbers  
326 using the next-generation matrix method in the post-restrictions period (solid lines, shaded area: 95%  
327 credible intervals). B) Projected  $R_0$  to the pre-pandemic period, assuming pre-pandemic sexual activity  
328 and using the mean of the three cities' secondary attack rate (79%). Next-generation matrix assumes  
329 proportionate mixing of sexual activity groups is assumed. P6M: past 6 months.

## 331 Sensitivity analyses

332 When restricting the sample to only participants with follow-up at each time period, the  
333 distributions of sexual partner numbers were broadly similar for all cities and time periods  
334 (**Figure S3**). Similarly, standardizing the distributions to the covariate distribution in Montréal  
335 did not substantially change the results for Vancouver. However, in Toronto, the tail of the

336 distribution of sexual partner numbers was slightly lighter in Toronto after standardization,  
337 especially for the pre-pandemic and post-restrictions time periods (*Figure S4*). When using anal  
338 sexual partner as outcome, the comparisons across cities and time periods did not qualitatively  
339 change, but the distributions had smaller means and lighter tails (*Figure S5*).

340 Overall, these sensitivity analyses suggest that the results are relatively robust to the  
341 weighting methods and to differences in covariate distributions across the cities. However, the  
342 expected  $R_0$  and SAR would be lower based on anal sexual partners as compared to all sexual  
343 partners.

## 344 **Discussion**

345 In a large RDS cohort of GBM in Canada's three largest cities, there was a marked  
346 decrease in the distribution of sexual partner numbers during the COVID-19 pandemic compared  
347 to the pre-pandemic period (2017–2019). Despite a small increase after travel restrictions were  
348 lifted (late 2021–early 2023), GBM sexual activity was well below pre-pandemic levels at the  
349 time of the 2022–2023 mpox outbreak. Despite the reductions in sexual partnerships, the  $R_0$  of  
350 mpox was approximately 2.5 in all three cities during the 2022–2023 mpox outbreak. As the  
351 population's social and sexual behaviors are expected to recover towards pre-pandemic levels,  
352 the mpox  $R_0$  may increase; it is therefore essential to continue public health surveillance and  
353 preventative activities —community outreach, vaccination— to mitigate the local impacts of  
354 mpox re-introductions into Canada.

355 We found that GBM had substantially fewer sexual partners in all three cities during the  
356 COVID-19 pandemic, and sexual activity remained lower than pre-pandemic levels even after  
357 restrictions were lifted. These findings are in line with previous research from Canada<sup>45,46</sup> and  
358 Europe<sup>19,47,48</sup> which suggest that GBM sexual behaviours were influenced by public health  
359 measures and messaging related to the COVID-19 pandemic. The implications of our findings  
360 are that as sexual behaviours are expected to return towards pre-pandemic levels, future mpox  
361 outbreaks remain possible. Outbreak risks are also further amplified with case importation risks  
362 in an interconnected world and limited availability of mpox vaccines and therapeutics in  
363 countries in Africa where mpox has been endemic for decades.<sup>49</sup>

364 We found that attendance of group sex events, participation in transactional sex, usage of  
365 dating apps, and visits to bathhouse and/or sex clubs were associated with higher numbers of  
366 sexual partners in urban Canadian GBM. Notably, group sex events, use of dating apps, and  
367 visits to bathhouse and/or sex clubs were also associated with earlier mpox cases during the  
368 2022-2023 outbreak.<sup>2,12</sup> In the context of ongoing low coverage of 2<sup>nd</sup> dose mpox vaccination  
369 across the three cities, and across other cities in Canada, these venues therefore provide a  
370 potentially interesting focus for prioritized and tailored vaccine strategies to increase coverage.  
371 For example, pop-up vaccine clinics could be set at bathhouses and sex clubs in partnership with  
372 community organizations.<sup>50-52</sup> Additionally, focused communication campaigns to promote  
373 mpox vaccination could be rolled out on GBM-dating apps.<sup>53,54</sup>

374 Across Montréal, Toronto, and Vancouver, we estimated an  $R_0$  of about 2.5 based on the  
375 incidence data. This is comparable to the 2.4 observed in Italy and in a pooled analysis of data  
376 from European countries.<sup>55,56</sup> However, there is high variability in  $R_0$  estimates from the pooled  
377 European analysis, with estimates ranging from 1.6 (Belgium) to 3.0 (Italy).<sup>56</sup> Despite this high  
378  $R_0$ , we estimated a cumulative incidence proportion of only 0.6-0.9% of GBM by October 2022.  
379 Similarly, an analysis by Murayama et al.<sup>15</sup> found that epidemic growth reached its peak at  
380 cumulative incidence proportions of 0.15–0.47% in various North American and European  
381 countries. Such estimates are substantially lower than the theoretical “herd immunity threshold”  
382 of 60% (assuming homogeneous contact rates) implied by the current  $R_0$  estimates, although  $R_0 <$   
383 1 may be more readily achieved if those at higher risk are disproportionately protected by  
384 vaccination and/or prior infection.<sup>57</sup>

385 The results should be interpreted considering three main limitations. First, our post-  
386 restrictions period overlaps with the time when spread of the SARS-CoV-2 Omicron variant took  
387 place. Thus, the estimated distribution of sexual partner numbers may have been affected by  
388 measures introduced in response to the Omicron SARS-CoV-2 wave. However, these restrictions  
389 were relatively short-lived, and our definition enabled consistent and comparable time period  
390 definitions across cities.<sup>58</sup> Second, although we used IPCW to address attrition bias, this bias  
391 may not have been fully adjusted if the loss to follow-up model was misspecified (i.e., not all  
392 variables associated with attrition were included). Lastly, our quantification of mpox  
393 transmission potential assumed proportionate (to degree) mixing among sexual activity groups



394 for computational simplicity. If mixing was “like-with-like” (assortative) by sexual activity, the  
395 modeled  $R_0$  given SAR would increase, and thus the inferred SAR would decrease.

396 Our approach to estimating the distribution of sexual partner numbers has several  
397 strengths. First, we implemented both RDS-II weights and IPCW to obtain estimates  
398 representative of sexually active GBM in the three largest Canadian cities. Furthermore, inter-  
399 city comparisons enabled us to account for potential differences in GBM communities in each  
400 city and explore their relative impact on the transmission dynamics of mpox. Finally, *Engage*'s  
401 longitudinal data collection allowed us to quantify behavioural changes among GBM from pre-  
402 COVID-19 pandemic up to February 2023.

## 403 **Conclusion**

404 In Montréal, Toronto, and Vancouver, GBM had fewer sexual partners during the  
405 COVID-19 pandemic. Even after travel restrictions were lifted in late 2021, sexual activities  
406 among urban Canadian GBM had not fully recovered to pre-pandemic levels. The overall  
407 distribution of sexual partner numbers was similar across cities, potentially explaining the similar  
408 observed cumulative fraction of mpox cases among GBM in the three cities. With sexual activity  
409 expected to return to pre-pandemic levels, public health authorities should consider the potential  
410 risk of mpox resurgence. Improving first- and second- dose vaccination coverage among  
411 individuals at risk with high numbers of sexual partners should be prioritized.

## 412 **Declarations**

## 413 **Acknowledgments**

414 The authors would like to thank the *Engage* study participants, office staff, and  
415 community engagement committee members, as well as our community partner agency, *RÉZO*.  
416 *Engage/Momentum II* is funded by the Canadian Institutes for Health Research (CIHR, #TE2-  
417 138299), the CIHR Canadian HIV/AIDS Trials Network (#CTN300), the Canadian Foundation  
418 for AIDS Research (CANFAR, #Engage), the Ontario HIV Treatment Network (OHTN, #1051),  
419 the Public Health Agency of Canada (Ref: 4500370314), Toronto Metropolitan University,  
420 Canadian Blood Services (#MSM2017LP-OD), and the Ministère de la Santé et des Services  
421 sociaux (MSSS) du Québec.

## 422 **Author contribution**

423 JLFA, FX, and MM-G contributed to the conception and design. JC, DG, TAH, MD, and  
424 SM were involved in the design, data collection, and data management of the *Engage Cohort*  
425 *Study*. Analyses were performed by JLFA and FX, with support from MM-G. JK, LW, OG, HS,  
426 MI, and SM provided input on preliminary methods discussions. The manuscript was drafted by  
427 FX and JLFA. All authors contributed to the interpretation of results and reviewed the  
428 manuscript for important intellectual content. Overall supervision for this project was provided  
429 by MM-G. All authors approved the final manuscript.

## 430 **Conflict of interest**

431 JC reports investigator-sponsored research grants from Gilead Sciences Canada and ViiV  
432 Healthcare, all outside of the submitted work. MM-G reports an investigator-sponsored research  
433 grant from Gilead Sciences Inc., and contractual arrangements from the World Health  
434 Organization and the Joint United Nations Programme on HIV/AIDS (UNAIDS), all outside of  
435 the submitted work. All other authors report no conflict of interest.

## 436 **Funding**

437 This study was funded by the *Canadian Network for Modeling Infectious Diseases*  
438 (CANMOD) to SM, MI, and MM-G, and a grant from the *Canadian Institutes of Health*  
439 *Research* (CIHR) to MI, SM, HS, and MM-G. MM-G's research program is funded by a Canada  
440 Research Chair (Tier 2) in *Population Health Modeling*. FX acknowledges a studentship from  
441 the *McGill Center for Viral Diseases*. TAH received support from a Chair in Gay and Bisexual  
442 Men's Health from the Ontario HIV Treatment Network. SM's research program is funded by a  
443 Canada Research Chair (Tier 2) in *Mathematical Modeling and Program Science*.

## 444 Software and source code

445 Analysis code is available on a *GitHub* repository ([https://github.com/pop-health-](https://github.com/pop-health-mod/mpox-engage-sex-networks)  
446 [mod/mpox-engage-sex-networks](https://github.com/pop-health-mod/mpox-engage-sex-networks)).

## 447 References

- 448 1. Huang Y, Mu L, Wang W. Monkeypox: epidemiology, pathogenesis, treatment and prevention. *Signal*  
449 *Transduct Target Ther.* 2022;7:373. doi:10.1038/s41392-022-01215-4
- 450 2. Thornhill JP, Barkati S, Walmsley S, et al. Monkeypox Virus Infection in Humans across 16 Countries  
451 — April–June 2022. *N Engl J Med.* 2022;387(8):679-691. doi:10.1056/NEJMoa2207323
- 452 3. Mathieu E, Spooner F, Dattani S, Ritchie H, Roser M. Mpox (monkeypox). *Our World Data.*  
453 Published online May 24, 2022. Accessed June 14, 2023. <https://ourworldindata.org/monkeypox>
- 454 4. WHO. WHO Director-General declares the ongoing monkeypox outbreak a Public Health Emergency  
455 of International Concern. Accessed April 8, 2023. [https://www.who.int/europe/news/item/23-07-2022-](https://www.who.int/europe/news/item/23-07-2022-who-director-general-declares-the-ongoing-monkeypox-outbreak-a-public-health-event-of-international-concern)  
456 [who-director-general-declares-the-ongoing-monkeypox-outbreak-a-public-health-event-of-](https://www.who.int/europe/news/item/23-07-2022-who-director-general-declares-the-ongoing-monkeypox-outbreak-a-public-health-event-of-international-concern)  
457 [international-concern](https://www.who.int/europe/news/item/23-07-2022-who-director-general-declares-the-ongoing-monkeypox-outbreak-a-public-health-event-of-international-concern)
- 458 5. La Presse Canadienne. La santé publique rapporte deux nouveaux cas de mpox diagnostiqués à  
459 Montréal. L'actualité. Published March 30, 2023. Accessed June 15, 2023.  
460 [https://lactualite.com/actualites/la-sante-publique-rapporte-de-nouveaux-cas-de-mpox-diagnostiques-a-](https://lactualite.com/actualites/la-sante-publique-rapporte-de-nouveaux-cas-de-mpox-diagnostiques-a-montreal/)  
461 [montreal/](https://lactualite.com/actualites/la-sante-publique-rapporte-de-nouveaux-cas-de-mpox-diagnostiques-a-montreal/)
- 462 6. BCCDC. Mpox. Accessed June 15, 2023. <http://www.bccdc.ca/health-info/diseases-conditions/mpox>
- 463 7. Public Health Ontario. Mpox in Ontario: May 1, 2022 to May 23, 2023. Published online 2022.
- 464 8. Public Health Agency of Canada. Mpox (monkeypox) epidemiology update — Canada.ca. Published  
465 August 12, 2022. Accessed June 14, 2023. <https://health-infobase.canada.ca/mpox/>
- 466 9. Dufranne Q. Deux cas de variole simienne recensés à Montréal; appel à la vigilance. Accessed April 8,  
467 2023. [https://journalmetro.com/actualites/montreal/3041126/deux-cas-de-variole-simienne-recenses-a-](https://journalmetro.com/actualites/montreal/3041126/deux-cas-de-variole-simienne-recenses-a-montreal-appel-a-la-vigilance/)  
468 [montreal-appel-a-la-vigilance/](https://journalmetro.com/actualites/montreal/3041126/deux-cas-de-variole-simienne-recenses-a-montreal-appel-a-la-vigilance/)
- 469 10. Ward T, Christie R, Paton RS, Cumming F, Overton CE. Transmission dynamics of monkeypox  
470 in the United Kingdom: contact tracing study. *BMJ.* 2022;379:e073153. doi:10.1136/bmj-2022-073153
- 471 11. Government of the UK. Investigation into monkeypox outbreak in England: technical briefing 1.  
472 GOV.UK. Accessed April 8, 2023. [https://www.gov.uk/government/publications/monkeypox-](https://www.gov.uk/government/publications/monkeypox-outbreak-technical-briefings/investigation-into-monkeypox-outbreak-in-england-technical-briefing-1)  
473 [outbreak-technical-briefings/investigation-into-monkeypox-outbreak-in-england-technical-briefing-1](https://www.gov.uk/government/publications/monkeypox-outbreak-technical-briefings/investigation-into-monkeypox-outbreak-in-england-technical-briefing-1)
- 474 12. Vusirikala A, Charles H, Balasegaram S, et al. Epidemiology of Early Monkeypox Virus  
475 Transmission in Sexual Networks of Gay and Bisexual Men, England, 2022. *Emerg Infect Dis.*  
476 2022;28(10):2082-2086. doi:10.3201/eid2810.220960
- 477 13. Spicknall IH, Pollock ED, Clay PA, et al. Modeling the Impact of Sexual Networks in the  
478 Transmission of Monkeypox virus Among Gay, Bisexual, and Other Men Who Have Sex with Men —  
479 United States, 2022. *Morb Mortal Wkly Rep.* 2022;71(35):1131-1135. doi:10.15585/mmwr.mm7135e2
- 480 14. Endo A, Murayama H, Abbott S, et al. Heavy-tailed sexual contact networks and monkeypox  
481 epidemiology in the global outbreak, 2022. *Science.* 2022;378(6615):90-94.  
482 doi:10.1126/science.add4507
- 483 15. Murayama H, Pearson CAB, Abbott S, et al. Accumulation of immunity in heavy-tailed sexual  
484 contact networks shapes mpox outbreak sizes. *J Infect Dis.* Published online July 4, 2023:jjad254.

- 485 doi:10.1093/infdis/jiad254
- 486 16. Adegboye OA, Eugenia Castellanos M, Alele FO, et al. Travel-Related Monkeypox Outbreaks in  
487 the Era of COVID-19 Pandemic: Are We Prepared? *Viruses*. 2022;14(6):1283.  
488 doi:10.3390/v14061283
- 489 17. Stigum H, Falck W, Magnus P. The core group revisited: The effect of partner mixing and  
490 migration on the spread of gonorrhoea, chlamydia, and HIV. *Math Biosci*. 1994;120(1):1-23.  
491 doi:10.1016/0025-5564(94)90036-1
- 492 18. Banuet-Martinez M, Yang Y, Jafari B, et al. Monkeypox: A review of epidemiological modelling  
493 studies and how modelling has led to mechanistic insight. *Epidemiol Infect*. Published online May 23,  
494 2023:1-44. doi:10.1017/S0950268823000791
- 495 19. Brown JR, Reid D, Howarth AR, et al. Sexual behaviour, STI and HIV testing and testing need  
496 among gay, bisexual and other men who have sex with men recruited for online surveys pre/post-  
497 COVID-19 restrictions in the UK. *Sex Transm Infect*. Published online March 1, 2023.  
498 doi:10.1136/sextrans-2022-055689
- 499 20. Gilbert M, Chang HJ, Ablona A, et al. Partner number and use of COVID-19 risk reduction  
500 strategies during initial phases of the pandemic in British Columbia, Canada: a survey of sexual health  
501 service clients. *Can J Public Health Rev Can Santé Publique*. 2021;112(6):973-983.  
502 doi:10.17269/s41997-021-00566-9
- 503 21. Volz E, Heckathorn DD. Probability Based Estimation Theory for Respondent Driven Sampling.  
504 *J Official Stat*.
- 505 22. Harvey-Lavoie S, Apelian H, Labbé AC, et al. Community-Based Prevalence Estimates of  
506 Chlamydia trachomatis and Neisseria gonorrhoeae Infections Among Gay, Bisexual, and Other Men  
507 Who Have Sex With Men in Montréal, Canada. *Sex Transm Dis*. 2021;48(12):939-944.  
508 doi:10.1097/OLQ.0000000000001486
- 509 23. Hart TA, Moore DM, Noor SW, et al. Prevalence of HIV and sexually transmitted and blood-  
510 borne infections, and related preventive and risk behaviours, among gay, bisexual and other men who  
511 have sex with men in Montreal, Toronto and Vancouver: results from the Engage Study. *Can J Public  
512 Health Rev Can Sante Publique*. 2021;112(6):1020-1029. doi:10.17269/s41997-021-00546-z
- 513 24. WHO. WHO Director-General's opening remarks at the media briefing on COVID-19 - 11 March  
514 2020. Accessed April 18, 2023. [https://www.who.int/director-general/speeches/detail/who-director-  
515 general-s-opening-remarks-at-the-media-briefing-on-covid-19---11-march-2020](https://www.who.int/director-general/speeches/detail/who-director-general-s-opening-remarks-at-the-media-briefing-on-covid-19---11-march-2020)
- 516 25. Canada Border Services Agency. Travel Advisory: REMINDER – On September 7, new  
517 measures for fully vaccinated international travellers to Canada will come into force. Published  
518 September 3, 2021. Accessed April 18, 2023. [https://www.canada.ca/en/border-services-  
519 agency/news/2021/09/travel-advisory-reminder--on-september-7-new-measures-for-fully-vaccinated-  
520 international-travellers-to-canada-will-come-into-force.html](https://www.canada.ca/en/border-services-agency/news/2021/09/travel-advisory-reminder--on-september-7-new-measures-for-fully-vaccinated-international-travellers-to-canada-will-come-into-force.html)
- 521 26. Chapin-Bardales J, Rosenberg ES, Sullivan PS, Jenness SM, Paz-Bailey G. Trends in Number  
522 and Composition of Sex Partners Among Men Who Have Sex With Men in the United States, National  
523 HIV Behavioral Surveillance, 2008–2014. *J Acquir Immune Defic Syndr* 1999. 2019;81(3):257-265.  
524 doi:10.1097/QAI.0000000000002025
- 525 27. Song M, Zhou X, Pazaris M, Spiegelman D. The Missing Covariate Indicator Method is Nearly  
526 Valid Almost Always. *arXiv*. Published online October 29, 2021. doi:10.48550/arXiv.2111.00138
- 527 28. Cole SR, Hernán MA. Constructing Inverse Probability Weights for Marginal Structural Models.  
528 *Am J Epidemiol*. 2008;168(6):656-664. doi:10.1093/aje/kwn164

- 529 29. Xiridou M, Miura F, Adam P, Op de Coul E, de Wit J, Wallinga J. The fading of the mpox  
530 outbreak among men who have sex with men: a mathematical modelling study. *medRxiv*. Published  
531 online 2023. doi:10.1101/2023.01.31.23285294
- 532 30. Delamater PL, Street EJ, Leslie TF, Yang YT, Jacobsen KH. Complexity of the Basic  
533 Reproduction Number (R0) - Volume 25, Number 1—January 2019 - Emerging Infectious Diseases  
534 journal - CDC. doi:10.3201/eid2501.171901
- 535 31. Diekmann O, Heesterbeek JA, Metz JA. On the definition and the computation of the basic  
536 reproduction ratio R0 in models for infectious diseases in heterogeneous populations. *J Math Biol*.  
537 1990;28(4):365-382. doi:10.1007/BF00178324
- 538 32. Diekmann O, Heesterbeek J a. P, Roberts MG. The construction of next-generation matrices for  
539 compartmental epidemic models. *J R Soc Interface*. 2009;7(47):873-885. doi:10.1098/rsif.2009.0386
- 540 33. Vynnycky E, White R. An introduction to infectious disease modelling. Accessed June 27, 2023.  
541 <https://anintroductiontoinfectiousdiseasemodelling.com/>
- 542 34. Porta M. Secondary Attack Rate. In: *A Dictionary of Epidemiology*. Oxford University Press;  
543 2016. Accessed July 7, 2023. <https://>
- 544 35. Suñer C, Ubals M, Tarín-Vicente EJ, et al. Viral dynamics in patients with monkeypox infection:  
545 a prospective cohort study in Spain. *Lancet Infect Dis*. 2023;23(4):445-453. doi:10.1016/S1473-  
546 3099(22)00794-0
- 547 36. Prasad S, Galvan Casas C, Strahan AG, et al. A dermatologic assessment of 101 mpox  
548 (monkeypox) cases from 13 countries during the 2022 outbreak: Skin lesion morphology, clinical  
549 course, and scarring. *J Am Acad Dermatol*. 2023;88(5):1066-1073. doi:10.1016/j.jaad.2022.12.035
- 550 37. Tarín-Vicente EJ, Alemany A, Agud-Dios M, et al. Clinical presentation and virological  
551 assessment of confirmed human monkeypox virus cases in Spain: a prospective observational cohort  
552 study. *Lancet Lond Engl*. 2022;400(10353):661-669. doi:10.1016/S0140-6736(22)01436-2
- 553 38. Sheffer R, Savion M, Nuss N, Amitai Z, Salama M. Monkeypox outbreak in the Tel Aviv  
554 District, Israel, 2022. *Int J Infect Dis*. 2023;128:88-90. doi:10.1016/j.ijid.2022.12.023
- 555 39. Sorge JT, Colyer S, Cox J, et al. Estimation of the Population Size of Gay, Bisexual and Other  
556 Men Who Have Sex with Men in Canada, 2020. Poster presented at: AIDS 2022 - The 24th  
557 International AIDS Conference; 2022; Montreal. Accessed July 11, 2023.  
558 [https://programme.aids2022.org/PAGMaterial/PPT/1639\\_6910/gbMSM\\_PSE\\_poster\\_AIDS2022\\_FIN](https://programme.aids2022.org/PAGMaterial/PPT/1639_6910/gbMSM_PSE_poster_AIDS2022_FIN)  
559 AL.pdf
- 560 40. Mauck DE, Gebrezgi MT, Sheehan DM, et al. Population-based methods for estimating the  
561 number of men who have sex with men: A systematic review. *Sex Health*. 2019;16(6):527-538.  
562 doi:10.1071/SH18172
- 563 41. Milwid RM, Xia Y, Doyle CM, et al. Past dynamics of HIV transmission among men who have  
564 sex with men in Montréal, Canada: a mathematical modeling study. *BMC Infect Dis*. 2022;22(1):233.  
565 doi:10.1186/s12879-022-07207-7
- 566 42. Statistics Canada. *Census Profile, 2021 Census of Population.*; 2023. Accessed August 1, 2023.  
567 <https://www12.statcan.gc.ca/census-recensement/2021/dp-pd/prof/index.cfm?Lang=E>
- 568 43. Sang JM, Gholamian B, Wang L, et al. Examining differential success in recruitment using  
569 respondent driven sampling (RDS) in a multi-site study of gay, bisexual and other men who have sex  
570 with men. *BMC Med Res Methodol*. 2023;23(1):136. doi:10.1186/s12874-023-01886-9
- 571 44. Towns JM, Lim CK, Chow EPF, et al. Persistence of monkeypox virus at oral and rectal sites.  
572 *Lancet Microbe*. 2023;4(4):e210. doi:10.1016/S2666-5247(22)00382-2

- 573 45. Skakoon-Sparling S, Palma PA, Zahran A, et al. Loneliness and the sexual behavior of sexual  
574 minority men in the context of the COVID-19 pandemic. *Soc Personal Psychol Compass*. Published  
575 online June 2023:e12814. doi:10.1111/spc3.12814
- 576 46. Daroya E, Grey C, Lessard D, et al. 'I did not have sex outside of our bubble': changes in sexual  
577 practices and risk reduction strategies among sexual minority men in Canada during the COVID-19  
578 pandemic. *Cult Health Sex*. 2022;0(0):1-17. doi:10.1080/13691058.2022.2139414
- 579 47. Williams A, Gillespie D, Couzens Z, Wood F, Hughes K, Hood K. Changing sexual behaviours  
580 amongst MSM during the COVID-19 restrictions in Wales: a mixed methods study. *BMC Public*  
581 *Health*. 2022;22(1):396. doi:10.1186/s12889-022-12821-w
- 582 48. Reyniers T, Rotsaert A, Thunissen E, et al. Reduced sexual contacts with non-steady partners and  
583 less PrEP use among MSM in Belgium during the first weeks of the COVID-19 lockdown: results of  
584 an online survey. *Sex Transm Infect*. 2021;97(6):414-419. doi:10.1136/sextrans-2020-054756
- 585 49. Adetifa I, Muyembe JJ, Bausch DG, Heymann DL. Mpox neglect and the smallpox niche: a  
586 problem for Africa, a problem for the world. *The Lancet*. 2023;401(10390):1822-1824.  
587 doi:10.1016/S0140-6736(23)00588-3
- 588 50. Holt W. Montreal Has A Pop-Up Monkeypox Vaccine Clinic Until August 7. MTL Blog.  
589 Published August 5, 2022. Accessed August 1, 2023. [https://www.mtlblog.com/montreal/montreal-](https://www.mtlblog.com/montreal/montreal-has-a-pop-up-monkeypox-vaccine-clinic-until-august-7)  
590 [has-a-pop-up-monkeypox-vaccine-clinic-until-august-7](https://www.mtlblog.com/montreal/montreal-has-a-pop-up-monkeypox-vaccine-clinic-until-august-7)
- 591 51. Lavoie J. Toronto bathhouse workers among first to be offered monkeypox vaccine. CTV News  
592 Toronto. Published June 11, 2022. Accessed August 1, 2023. [https://toronto.ctvnews.ca/toronto-](https://toronto.ctvnews.ca/toronto-bathhouse-workers-among-first-to-be-offered-monkeypox-vaccine-1.5942961)  
593 [bathhouse-workers-among-first-to-be-offered-monkeypox-vaccine-1.5942961](https://toronto.ctvnews.ca/toronto-bathhouse-workers-among-first-to-be-offered-monkeypox-vaccine-1.5942961)
- 594 52. CBC News. Monkeypox vaccines to be offered at Vancouver bathhouses as 21 cases confirmed  
595 in B.C. CBC. Published July 9, 2022. Accessed August 1, 2023.  
596 <https://www.cbc.ca/news/canada/british-columbia/monkeypox-vaccine-pride-1.6515118>
- 597 53. Harrison LB, Bergeron G, Cadieux G, et al. Monkeypox in Montréal: Epidemiology,  
598 Phylogenomics, and Public Health Response to a Large North American Outbreak. *Ann Intern Med*.  
599 2023;176(1):67-76. doi:10.7326/M22-2699
- 600 54. Reyes-Urueña J, D'Ambrosio A, Croci R, et al. High monkeypox vaccine acceptance among  
601 male users of smartphone-based online gay-dating apps in Europe, 30 July to 12 August 2022. *Euro*  
602 *Surveill Bull Eur Sur Mal Transm Eur Commun Dis Bull*. 2022;27(42):2200757. doi:10.2807/1560-  
603 7917.ES.2022.27.42.2200757
- 604 55. Guzzetta G, Mammone A, Ferraro F, et al. Early Estimates of Monkeypox Incubation Period,  
605 Generation Time, and Reproduction Number, Italy, May–June 2022. *Emerg Infect Dis*.  
606 2022;28(10):2078-2081. doi:10.3201/eid2810.221126
- 607 56. Branda F, Pierini M, Mazzoli S. Monkeypox: Early estimation of basic reproduction number R0  
608 in Europe. *J Med Virol*. 2023;95(1):e28270. doi:10.1002/jmv.28270
- 609 57. Fine P, Eames K, Heymann DL. "Herd Immunity": A Rough Guide. *Clin Infect Dis*.  
610 2011;52(7):911-916. doi:10.1093/cid/cir007
- 611 58. CIHI. Canadian COVID-19 Intervention Timeline. Accessed June 19, 2023.  
612 <https://www.cihi.ca/en/canadian-covid-19-intervention-timeline>
